# Supplementary material
Source: PubMed Central journal article supplement (PMC2859507)
Supplement: supp_M109.097394_jbc.M109.097394-1.pdf [file supp_M109.097394_jbc.M109.097394-1.pdf]

**Supplemental data:**

**Supplemental table**

| <b>Treatment:</b>         | <b>n</b> | <b>Amplitude <math>\pm</math> SD</b><br><b>[<math>10^{-3}</math> L/L<sub>max</sub>]</b> |
|---------------------------|----------|-----------------------------------------------------------------------------------------|
| 20 nM flg22               | 6        | 1.2 $\pm$ 0.5                                                                           |
| 10 nM flg22               | 8        | 0.5 $\pm$ 0.2                                                                           |
| 20 nM AtPep1              | 5        | 0.2 $\pm$ 0.1                                                                           |
| 10 nM flg22 + 10nM AtPep1 | 8        | 0.4 $\pm$ 0.2                                                                           |
| 10 nM flg22 + 10nM AtPep2 | 9        | 0.4 $\pm$ 0.2                                                                           |
| 10 nM flg22 + 10nM AtPep3 | 9        | 0.4 $\pm$ 0.2                                                                           |

n – number of plants examined

**Table S1. Transient rise in calcium concentrations in response to MAMPs and DAMPs.**

*Arabidopsis thaliana* (Col-0) expressing aequorin was pre-incubated with coelenterazine and then subjected to treatments by various MAMPs and DAMPs. The mean amplitudes of relative luminescence were determined as a measure of the maximal rise of cytoplasmic Ca<sup>2+</sup> levels. The relative luminescence was determined from the ratio of the actual luminescence per second and the total luminescence emitted from “discharged” aequorin following treatment of tissue with a 1 M CaCl<sub>2</sub> in 10% ethanol.

## Supplemental figures

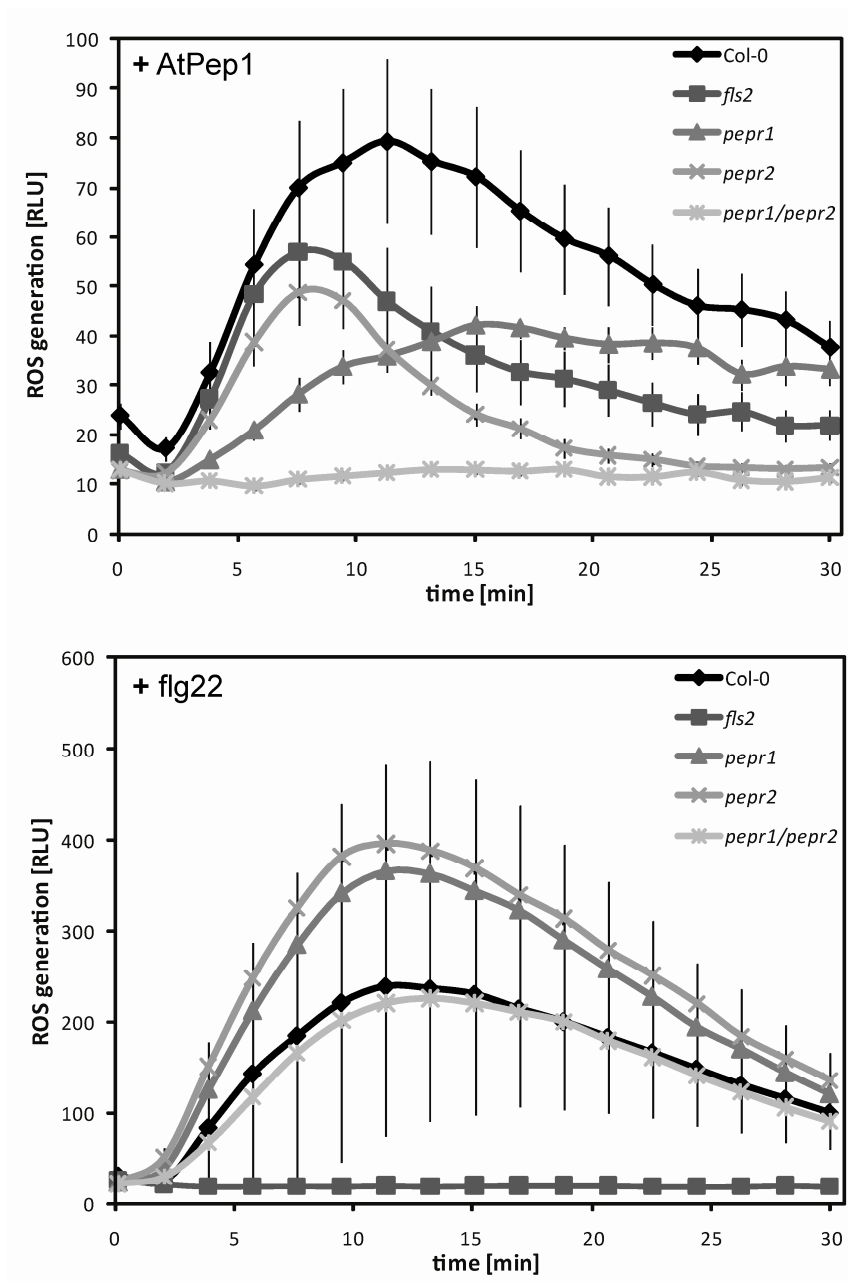

**Fig. S1.** Kinetics of ROS production in response to AtPep1 (A) or flg22 (B). Traces represent an individual experiment while the superimposed error bars correspond to SE ( $n \geq 6$ ).

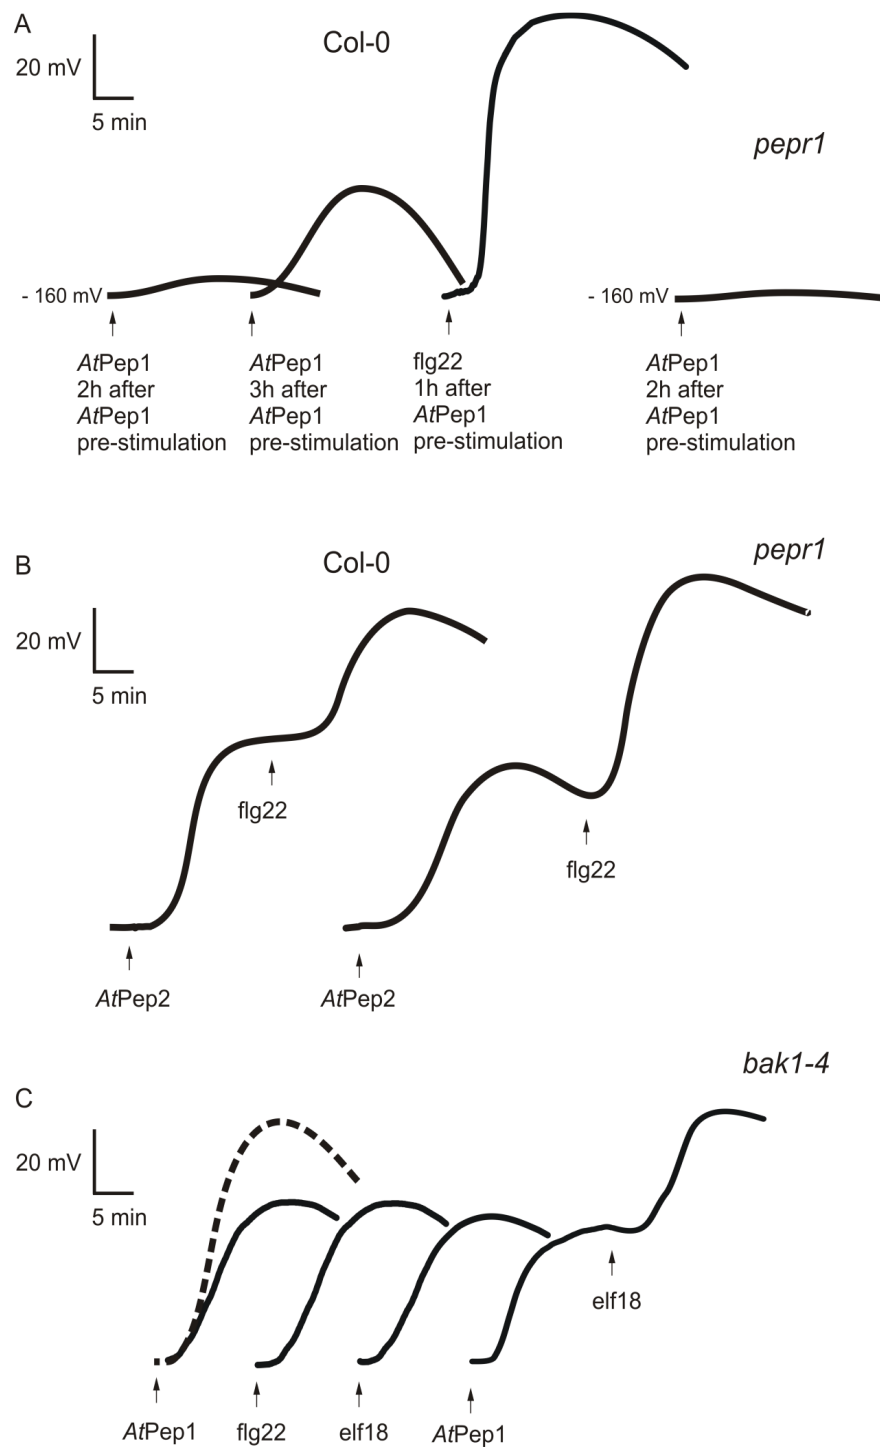

**Fig. S2.** MAMP- and DAMP-associated membrane responses show independent desensitization (A) and additivity (B) irrespective of sharing a common receptor partner (C). While after 2 h a second application of AtPep1 on fully repolarized cells still fails to evoke a second depolarisation by AtPep1, 3 h refraction is sufficient for regaining of *ca* 50% of responsiveness. Such behaviour is present in both *pepr1* and WT plants. Additive character of MAMP- and DAMP-triggered depolarizations preserves in *pepr1* and *bak1-4* mutants. Interestingly, all depolarizations are severely compromised in amplitudes in *bak1-4* plants and lose characteristic differences in amplitudes (*cf.* Table 2). For better comparison a WT-like AtPep1-induced membrane potential change is superimposed on a corresponding draft (dashed line).
